# Supplementary material for: Sensitive detection of clenbuterol by hybrid iridium/silicon nanowire-enhanced laser desorption/ionization mass spectrometry
Source: Royal Society of Chemistry journal article supplement (doi:10.1039/d0tb00186d), 2020-01-01
Supplement: d0tb00186d1.pdf [file d0tb00186d1.pdf]

## Sensitive Detection of Clenbuterol by Hybrid Iridium/Silicon Nanowires-Enhanced Laser Desorption/Ionization Mass Spectrometry

Rui Lv<sup>†a</sup>, Enhui Wu<sup>†a</sup>, Renfei Wu<sup>†a</sup>, Wen Shen<sup>a</sup>, Chongqing Ma<sup>a</sup>, Rui Shi<sup>a</sup>, Ruochen Guo<sup>a</sup>, Mingwang Shao<sup>a</sup> and Jian Liu<sup>\*a</sup>

Institute of Functional Nano and Soft Materials (FUNSOM), Jiangsu Key Laboratory for Carbon-Based Functional Materials and Devices, Soochow University, Suzhou, Jiangsu Province 215123, China. Email: jliu@suda.edu.cn

### Abstract

There is an increasing demand in anti-doping drug monitoring in sports and food safety check by developing sensitive and fast analytical methods. Here we report the development of hybrid Ir/SiNW as a new MALDI matrix for detection of small molecules. This matrix is characteristic of sufficient UV absorption, low-noise background, and high efficiency in ionization of small molecules. Sensitive detection of clenbuterol (LOD: 0.18 pmol) and varieties of other small molecules have been achieved using Ir/SiNW matrix with a reproducible performance. Compared to the individual components separately, the matrix of hybrid Ir/SiNW synthesized via *in situ* growth can promote the MS signal intensity by up to 10 folds in the identical experimental conditions. We provide a unique mechanism for the high performance of hybrid Ir/SiNW matrix with the characteristic properties of hydrogen atom transferring and enhanced protonation at the interface of the hybrid nanostructures. Our approach of using hybrid Ir/SiNW matrix enables detection of clenbuterol quantitatively in complicated biological samples and *in vivo* experiments, promising a useful tool for food security and anti-doping drug monitoring in sports.

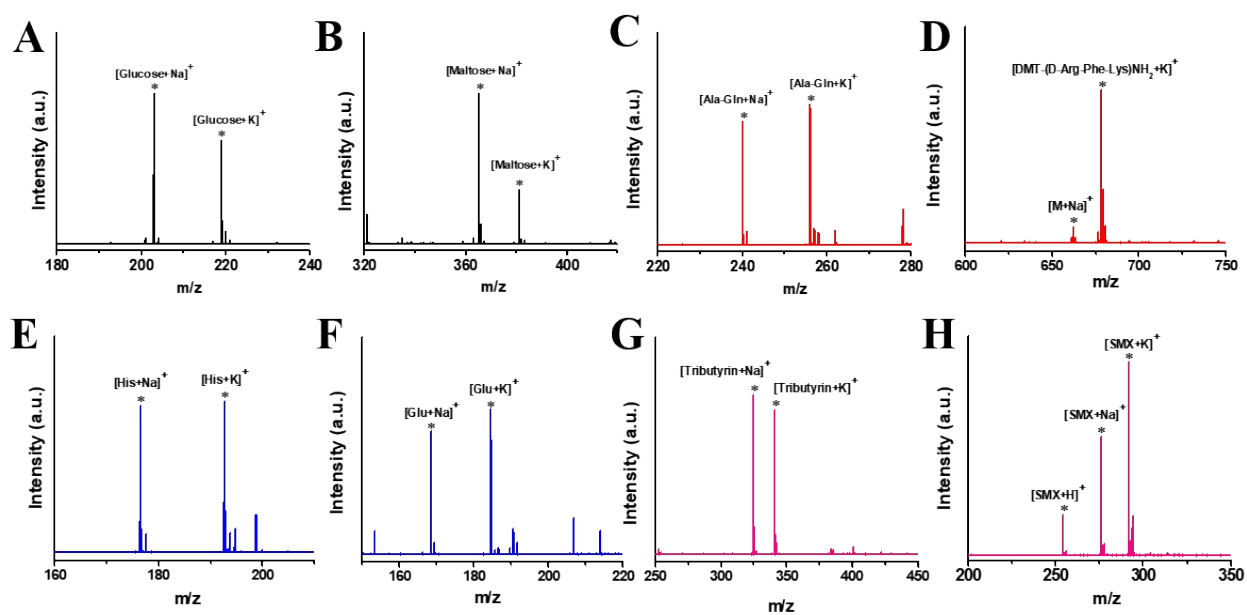

**Fig. S1** Mass spectra of small molecular analytes in different categories using hybrid on Ir/SiNW matrix. (A) Glucose, (B) Maltose, (C) Ala-Gln, (D) DMT-[D-Arg-Phe-Lys]-NH<sub>2</sub>, (E) Histidine, (F) Glutamate, (G) Tributyrin, (H) Sulfamethoxazole. Concentration: 100 mg/L. The relative laser power is 30 %. Each laser spot size is about 50  $\mu\text{m}$ , each mass spectrum adds up to 3000 laser spots.

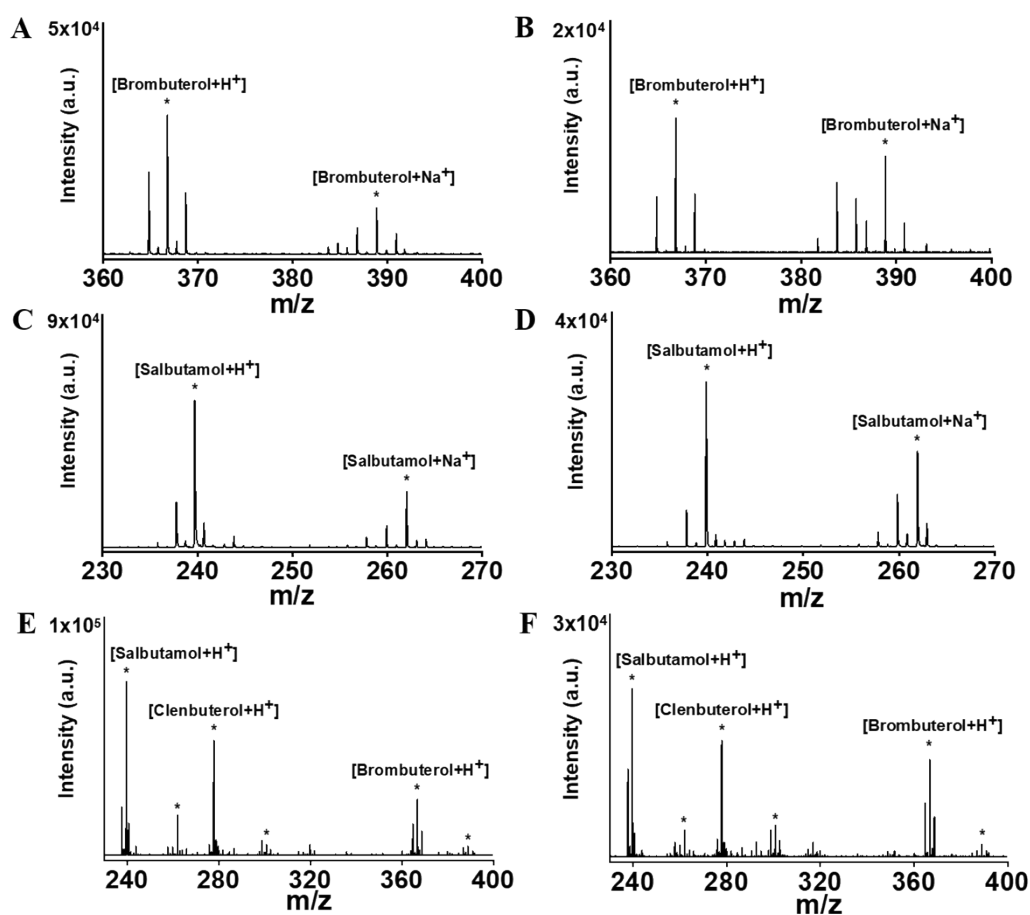

**Fig. S2** Mass spectra of Brombuterol and Salbutamol using Ir/SiNW matrix. (A-B) Brombuterol, (C-D) Salbutamol, (E-F) Mixture of Brombuterol, Salbutamol and Clenbuterol. A, C and E prepared with DI water; B, D and F prepared with mouse serum. Concentration: 100 mg/L. Laser spot size: 50  $\mu$ m. Accumulation: 3000 laser spots for each spectrum.

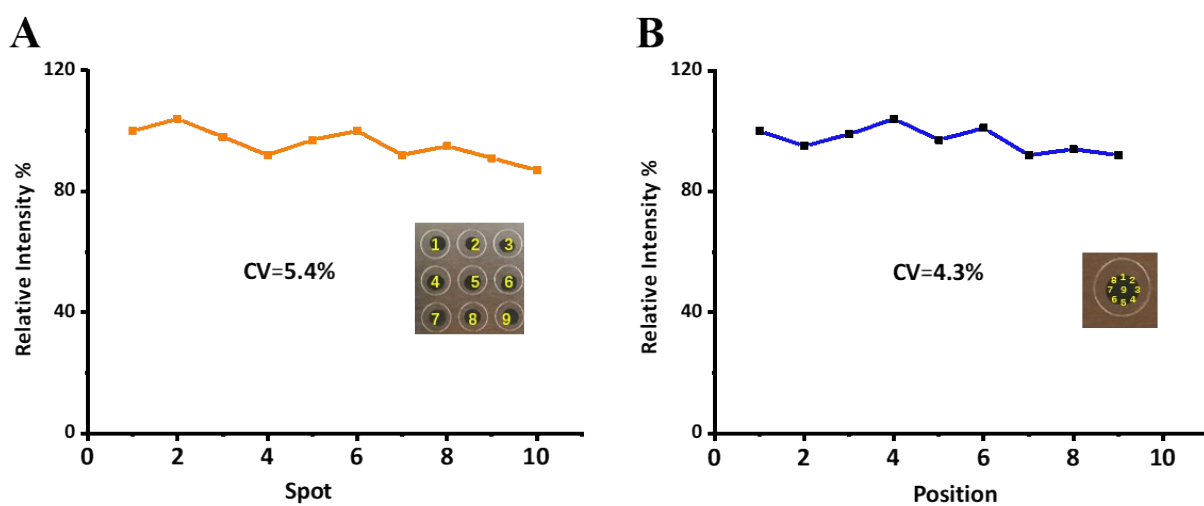

**Fig. S3** Highly reproducible MS signal intensity by using the Ir/SiNW matrix. Analyte: clenbuterol. (A) 9 different spots in the 3 x 3 array. (B) 9 different positions in a single spot of analyte/ Ir/SiNW. The coefficient of variation (CV) values: only 5.4% spot-to-spot tests or 4.3% in the position-to-position tests. Insets: the photos of the spots deposited on the MALDI plate containing the analyte/matrix.

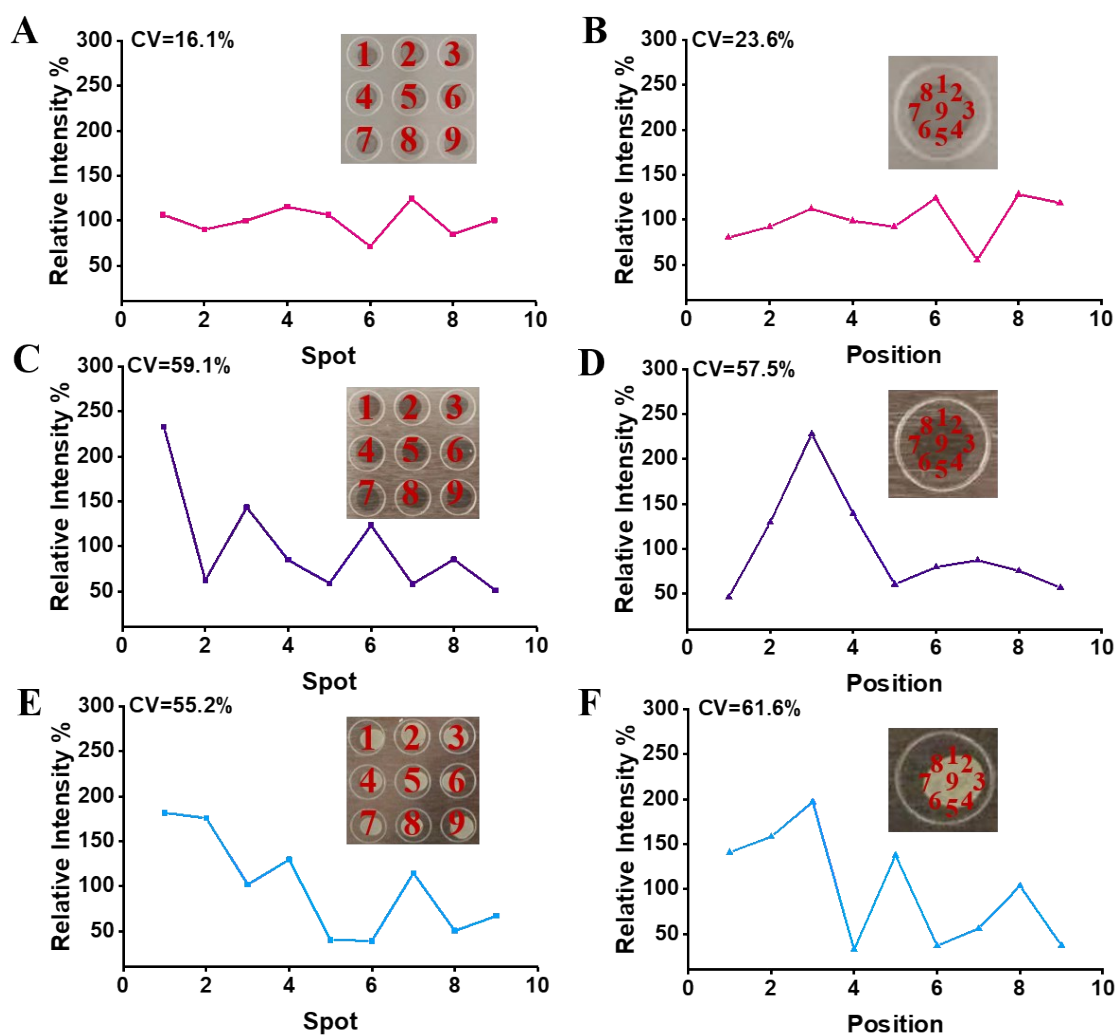

**Fig. S4** Evaluation of MS signal reproducibility using different types of inorganic matrices for comparison. (A, C, E) 9 separate spots in the  $3 \times 3$  array. (B, D, F) 9 different positions in a single spot of analyte/matrix. Insets: The photos of the spots deposited on the MALDI plate containing the analyte/matrix as specified. Matrices: Au nanoparticles (A, B), graphene oxide nanosheets (C, D), bare silicon nanowires (E, F). Analyte: clenbuterol.

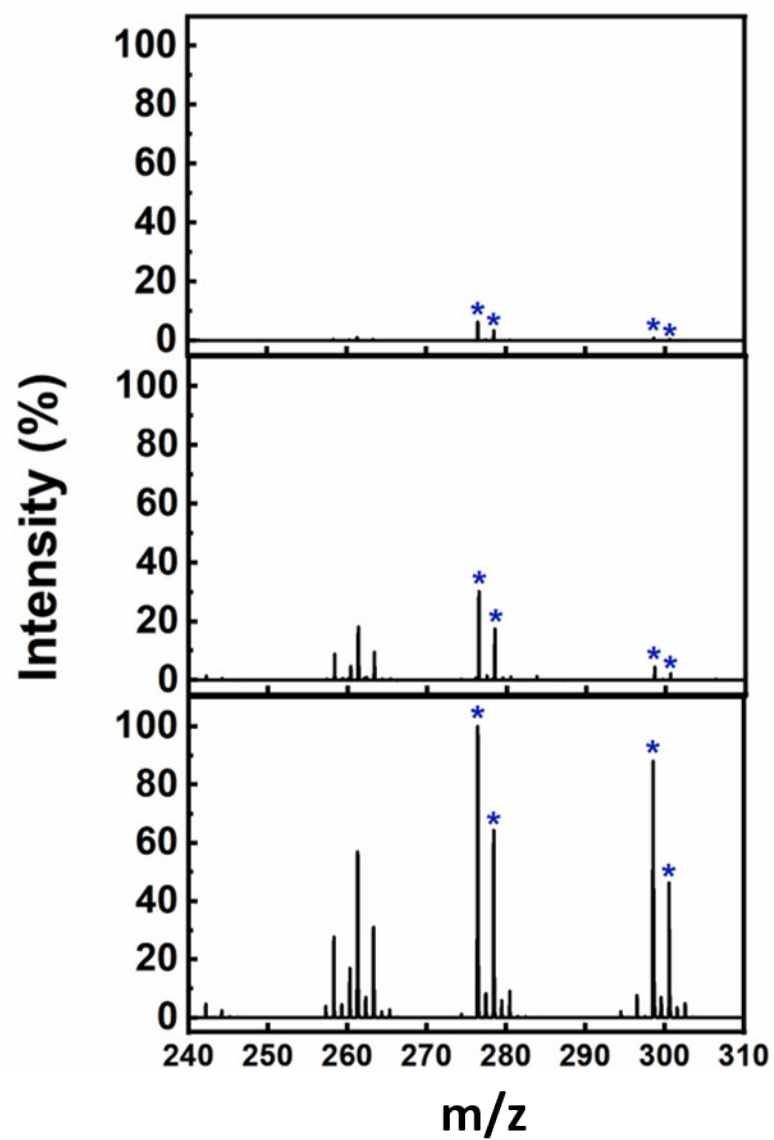

**Fig. S5** Mass spectra of CL using Ir, SiNW, and Ir/SiNW matrices. The MALDI MS detection was performed in the positive-ion mode.

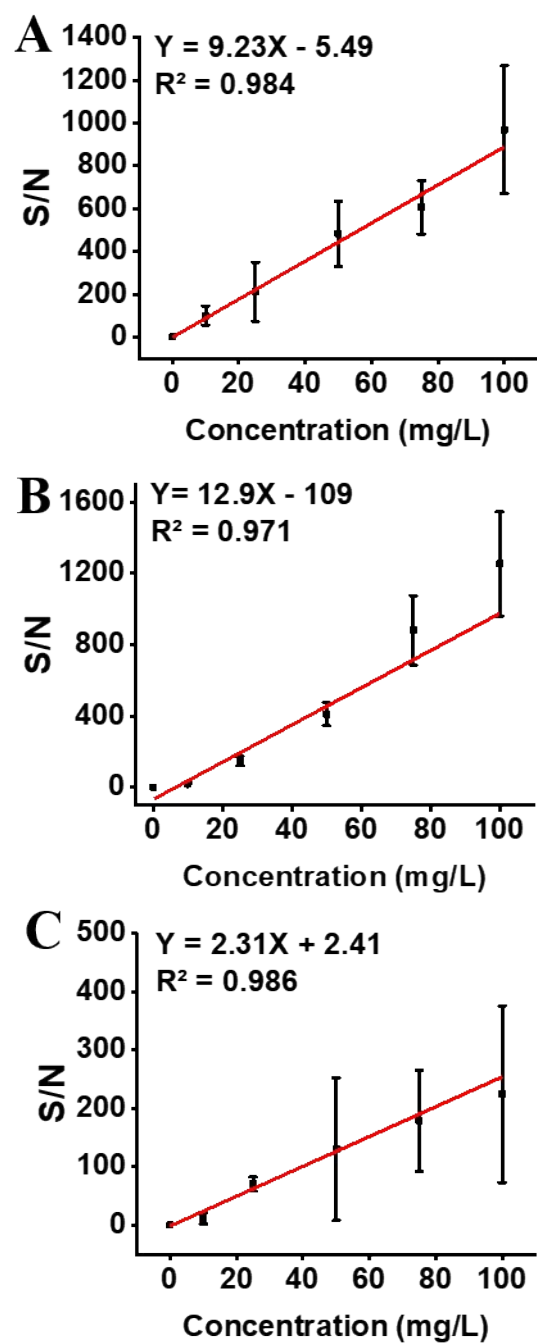

**Fig. S6** Evaluation of organic matrices for the detection of CL, including (A) CHCA, (B) DHB, and (C) SA. Error bar: standard deviation (n=3).

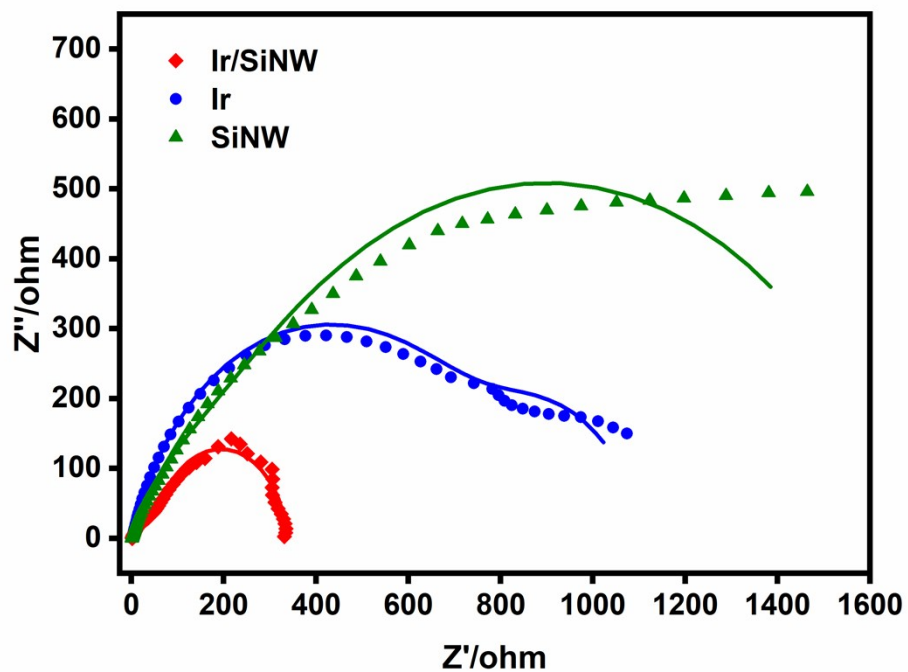

**Fig. S7** Electrochemical impedance spectroscopy (EIS) analysis of Ir/SiNW, Ir nanoparticles, and bare SiNW. EIS measurements recorded between  $1 \times 10^5$  Hz and 0.1 Hz with a sinusoidal voltage perturbation of 5 mV amplitude.

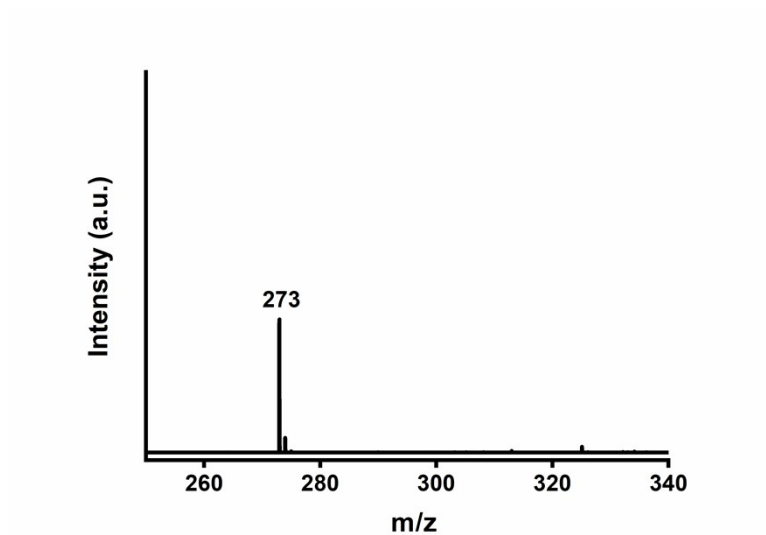

**Fig. S8** Mass spectrum of the blank mouse blood sample without clenbuterol, after the identical procedure of sample pretreatment.

**Table S1** Performance of Ir/SiNW matrix-assisted MALDI MS in comparison to other analysis techniques.

| Method                                             | Analyte        | R <sup>2</sup> | LOD* (pmol)            | Concentration range (mg/L)    | Internal standard | Sample Volume (μL) | Extraction procedure | Reproducibility |
|----------------------------------------------------|----------------|----------------|------------------------|-------------------------------|-------------------|--------------------|----------------------|-----------------|
| <b>MALDI-TOF MS</b><br>(our method)                | clenbuterol    | 0.998          | 0.18                   | 1-100                         | Clenbuterol-D9    | 1                  | 3 steps              | CV < 5.4%       |
| HPLC <sup>33</sup>                                 | clenbuterol    | 0.99           | 2.8x10 <sup>-3</sup>   | (1.38-5.52) x10 <sup>-3</sup> | /                 | 20                 | 6 steps              | CV: 4.5-8.5%    |
| HPLC-MS <sup>34</sup>                              | ractopamine    | 0.999          | 0.507                  | 5-1000                        | /                 | 100                | 7 steps              | CV > 5.8%       |
| LC-ESI-TOF MS <sup>35</sup>                        | clenbuterol    | 0.998          | 9.42 x10 <sup>-4</sup> | (0.013-10) x10 <sup>-3</sup>  | Mabuterol         | 20                 | 7 steps              | CV: 1.3-7.0%    |
| LC-MS/MS <sup>36</sup>                             | clenbuterol    | 0.999          | 9.05 x10 <sup>-4</sup> | (0.01-1) x10 <sup>-3</sup>    | Clenbuterol-D9    | 25                 | 5 steps              | CV: 0.7-17.9%   |
| CE-UV <sup>37</sup>                                | clenbuterol    | 0.999          | 0.137                  | 2-100                         | Terbutaline       | 40                 | 8 steps              | /               |
| iEESI-MS <sup>38</sup>                             | Six β-agonists | 0.999          | /                      | /                             | /                 | 100                | /                    | RSD: 6.5-11.3%  |
| Electrochemical detection aptasensor <sup>39</sup> | clenbuterol    | 0.991          | 0.181                  | (0.1-500) x10 <sup>-6</sup>   | /                 | 5x10 <sup>3</sup>  | /                    | RSD: 2.09%      |

LOD\*: limit of detection.

CV: coefficients of variation.

RSD: relative standard deviation.

/: Not Available.

**Table S2** Performance comparison of silicon-based matrices and other inorganic nanomaterials for MALDI mass spectrometry

|                                  |                                                                   | Analyzed Molecules                        | LOD<br>(S/N = 3)   | Reproducibility | Mass spectra<br>range | Concentration range<br>(mg/L) |
|----------------------------------|-------------------------------------------------------------------|-------------------------------------------|--------------------|-----------------|-----------------------|-------------------------------|
| Silicon-based<br>matrices        | Ir/SiNW<br>(This work)                                            | clenbuterol                               | 0.18 pmol          | CV: ~ 5%        | m/z 0-800             | 1-100                         |
|                                  | Silicon nanopillar arrays <sup>40, 41</sup>                       | methadone                                 | 0.31 pmol          | /               | m/z 270-3000          | 0.02-2                        |
|                                  | Silicon nanopowder <sup>40, 42</sup>                              | propafenone, verapamil<br>et al.          | 33 fmol - 100 pmol | /               | m/z 0-1000            | 0.003-455                     |
|                                  | Periodic mesoporous<br>organosilica (PMO) films <sup>40, 43</sup> | peptides                                  | ~ 0.6 pmol         | /               | m/z 500-1800          | /                             |
| Other inorganic<br>nanomaterials | Au NPs <sup>44</sup>                                              | glutathione, angiotensin<br>I, insulin    | 2 - 100 pmol       | CV: 18-29%      | m/z 300-1300          | 1.5-61.2                      |
|                                  | Graphene Oxide <sup>45</sup>                                      | tetracyclines                             | 2 fmol             | RSD: 2.33%      | m/z 0-800             | 0.08-44.4                     |
|                                  | Oxidized carbon nanotubes <sup>46</sup>                           | berberine,<br>jatrorrhizine,<br>palmatine | ~ 3 fmol           | RSD < 10%       | m/z 0-3000            | 1-100                         |
|                                  | Carbon nanodots <sup>47</sup>                                     | amino acids, peptides et al.              | 2 fmol - 0.5 pmol  | RSD < 4.2%      | m/z 0-1000            | 90-1620                       |
